# Supplementary material
Source: PubMed Central journal article supplement (PMC7193950)
Supplement: NIHMS1019784-supplement-SUPPLEMENTARY_FIGURES.pdf [file NIHMS1019784-supplement-SUPPLEMENTARY_FIGURES.pdf]

## Suppl Fig. 1

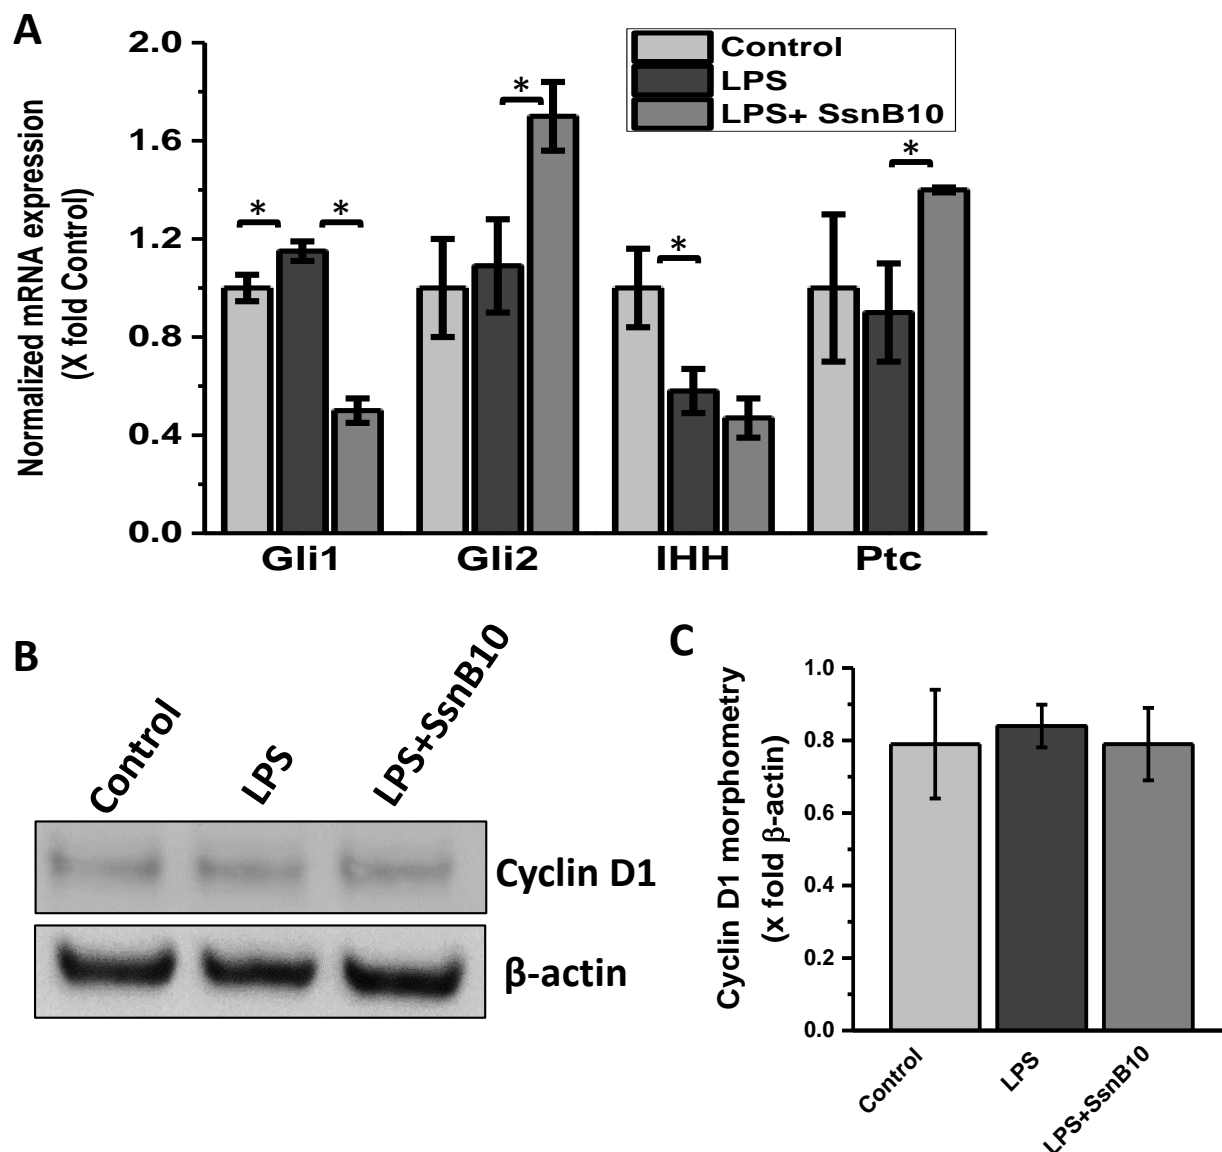

**Suppl Fig 1. A:** qRT-PCR analysis of mRNA expression of Gli1, Gli2, IHH, Ptc from Control (untreated), LPS-treated and LPS+SsnB10(10μM) treated Rat primary hepatic stellate cells, normalized against control (\*P < 0.05). **B:** Western blot analysis of Cyclin D1 and β-actin protein levels of Control (untreated), LPS-treated, and LPS+SsnB10(10μM) treated Rat primary hepatic stellate cells. **C.** Morphometric analysis of western blot, the bar diagram represents the level of cyclin D1 normalized against β-actin of respective samples. (\*) P<0.05 is considered statistically significant

## Suppl Fig. 2

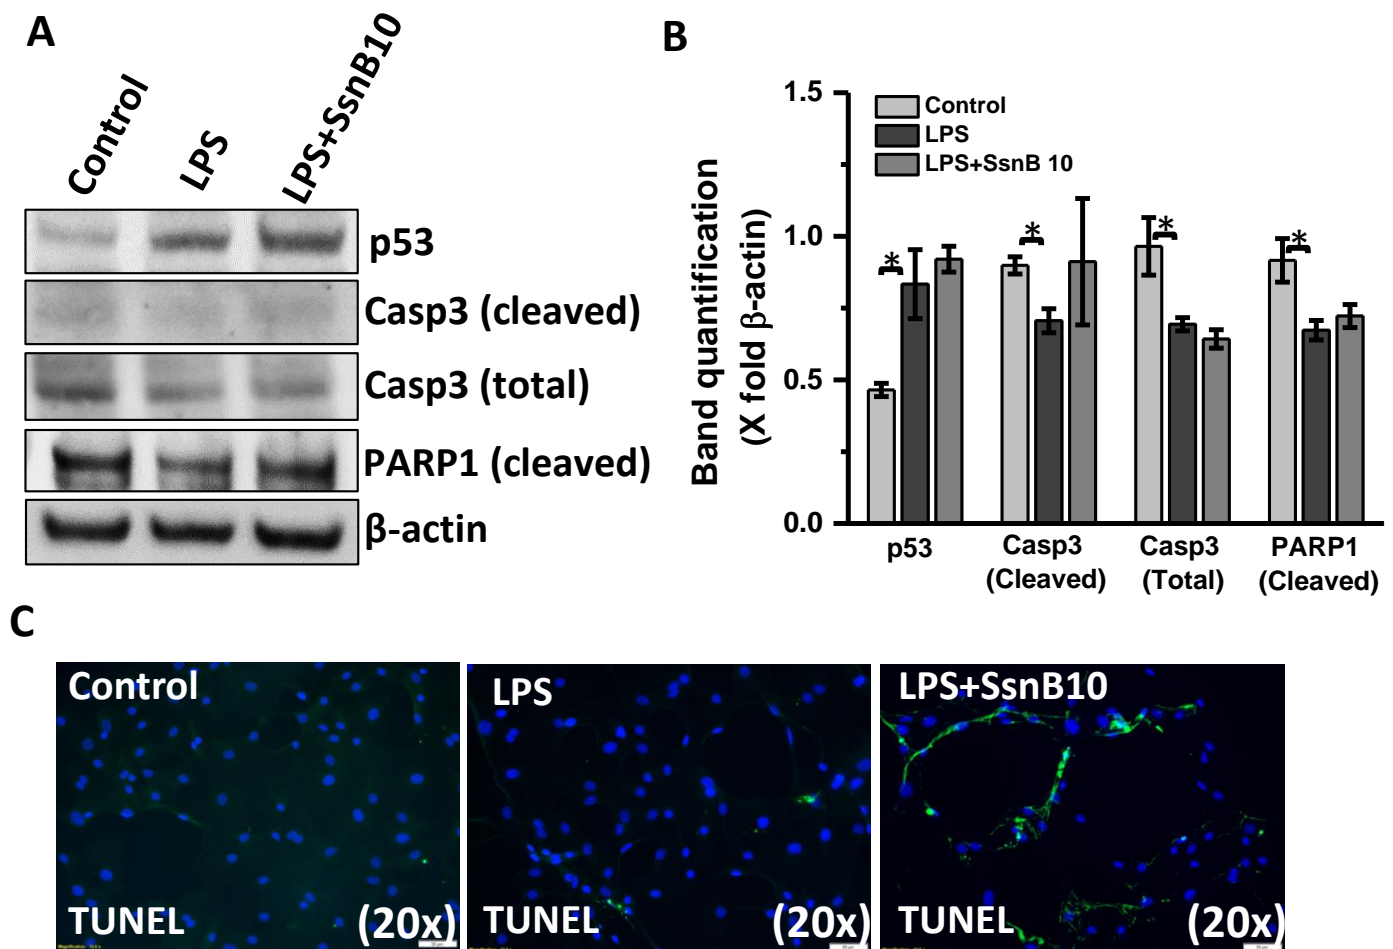

**Suppl Fig.2. SsnB treatment induces apoptosis in rat hepatic stellate cells. A.** Western blot analysis of p53, cleaved caspase3 (Casp3), total caspase3 (Casp3), cleaved PARP1 and β-actin protein levels of Control (untreated), LPS-treated, and LPS+SsnB10 (10μM) treated Rat primary hepatic stellate cells. **B.** Morphometric analysis of western blot, the bar diagram represents the level of p53, cleaved caspase3, total caspase3, cleaved PARP1 normalized against β-actin of respective samples. (\*)  $P < 0.05$  is considered statistically significant. **C.** Apoptosis is indicated by TUNEL based ApopTag® technology (EMD Millipore, MO) which labels 3'-OH ends of DNA fragments by fluorescent antibody as detected by immunofluorescence microscopy in Control (untreated), LPS-treated, and LPS+SsnB10 (10μM) treated Rat Primary hepatic stellate cells

## Suppl Fig. 3

**A**

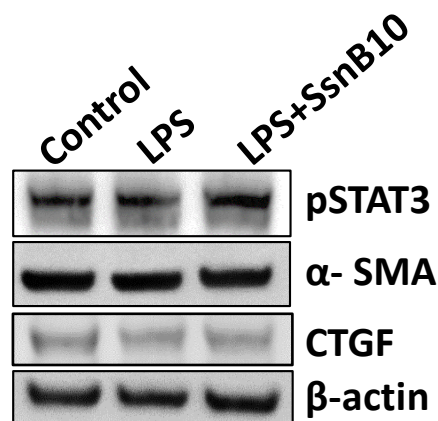

**B**

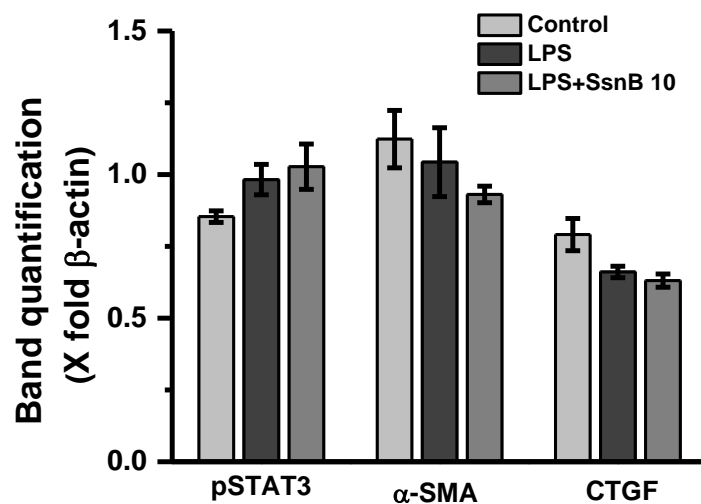

**Suppl Fig. 3. A.** Western blot analysis of phospho STAT3, α-SMA, CTGF and β-actin protein levels of Control (untreated), LPS-treated, and LPS+SsnB10 (10μM) treated Rat primary hepatic stellate cells. **B.** Morphometric analysis of western blot, the bar diagram represents the level of pSTAT3, α-SMA, and CTGF normalized against β-actin of respective samples.
